# Supplementary material for: The Risk of Stroke and Stroke Type in Patients With Atrial Fibrillation and Chronic Kidney Disease
Source: PubMed Central journal article supplement — Can J Kidney Health Dis. 2019 Dec 4;6:2054358119892372. doi: 10.1177/2054358119892372 (PMC6893926; doi:10.1177/2054358119892372), 2019-12-04
Supplement: Online_Supplement.pdf [file Online_Supplement.pdf]

## Online Supplement

### Supplementary Figures & Tables

Supplementary Figure 1: Study cohort creation

Supplementary Table 1: REporting of studies Conducted using Observational Routinely-collected health Data (RECORD) statement checklist

Supplementary Table 2: Administrative data definitions

Supplementary Table 3: Number of events and adjusted stroke risk with atrial fibrillation across eGFR levels.

Supplementary Table 4: Number of events and adjusted stroke risk with atrial fibrillation across ACR levels.

Supplementary Table 5: Crude number of events for stroke by atrial fibrillation status, eGFR and ACR level.

**Figure 1.** Study cohort creation

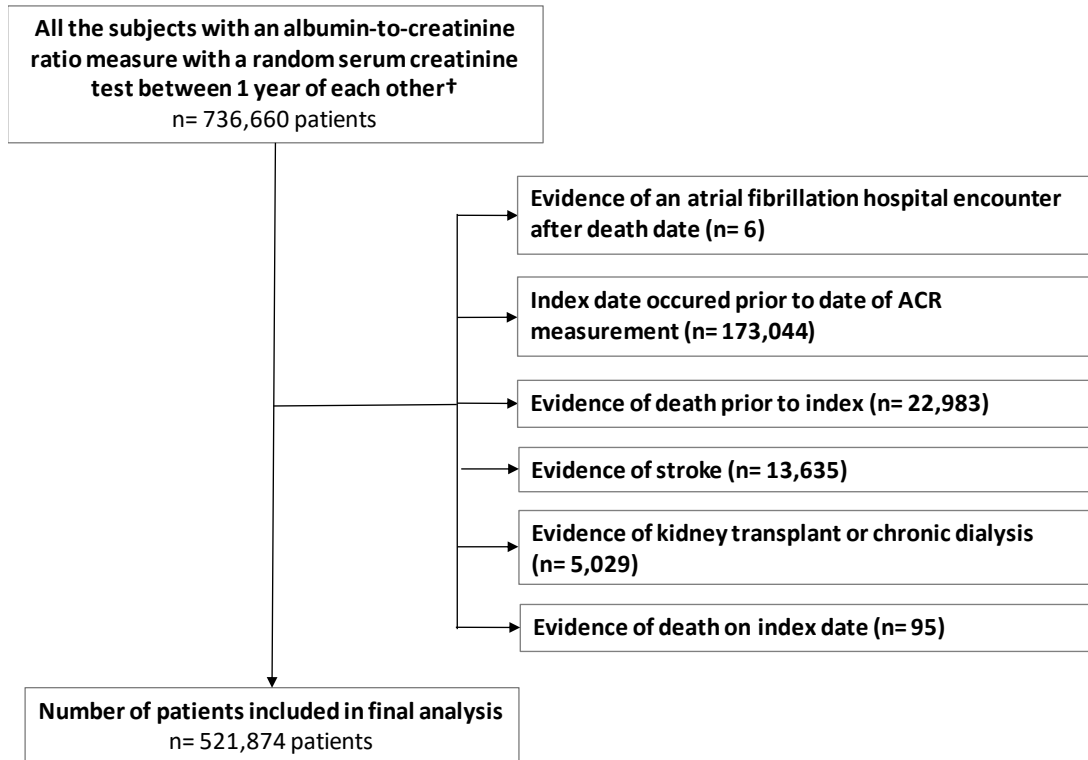

ACR albumin to creatinine ratio

**Table 1.** REporting of studies Conducted using Observational Routinely-collected health Data (RECORD) statement checklist

|                           | Item No | STROBE items                                                                                                                                                                                    | RECORD items                                                                                                                                                                                                                                                                                                                                                                                                       | Reported                    |
|---------------------------|---------|-------------------------------------------------------------------------------------------------------------------------------------------------------------------------------------------------|--------------------------------------------------------------------------------------------------------------------------------------------------------------------------------------------------------------------------------------------------------------------------------------------------------------------------------------------------------------------------------------------------------------------|-----------------------------|
| <b>Title and abstract</b> | 1       | (a) Indicate the study's design with a commonly used term in the title or the abstract.<br>(b) Provide in the abstract an informative and balanced summary of what was done and what was found. | (1.1) The type of data used should be specified in the title or abstract. When possible, the name of the databases used should be included.<br>(1.2) If applicable, the geographic region and time frame within which the study took place should be reported in the title or abstract.<br>(1.3) If linkage between databases was conducted for the study, this should be clearly stated in the title or abstract. | Abstract                    |
| <b>Introduction</b>       |         |                                                                                                                                                                                                 |                                                                                                                                                                                                                                                                                                                                                                                                                    |                             |
| Background/rationale      | 2       | Explain the scientific background and rationale for the investigation being reported.                                                                                                           |                                                                                                                                                                                                                                                                                                                                                                                                                    | Introduction                |
| Objectives                | 3       | State specific objectives, including any prespecified hypotheses.                                                                                                                               |                                                                                                                                                                                                                                                                                                                                                                                                                    | Introduction                |
| <b>Methods</b>            |         |                                                                                                                                                                                                 |                                                                                                                                                                                                                                                                                                                                                                                                                    |                             |
| Study design              | 4       | Present key elements of study design early                                                                                                                                                      |                                                                                                                                                                                                                                                                                                                                                                                                                    | Methods: Design and Setting |

|              |   |                                                                                                                                                                                                                     |                                                                                                                                                                                                                                                                                                                                                                                                                                                                                                                                                                                                                                                                                                                                                 |
|--------------|---|---------------------------------------------------------------------------------------------------------------------------------------------------------------------------------------------------------------------|-------------------------------------------------------------------------------------------------------------------------------------------------------------------------------------------------------------------------------------------------------------------------------------------------------------------------------------------------------------------------------------------------------------------------------------------------------------------------------------------------------------------------------------------------------------------------------------------------------------------------------------------------------------------------------------------------------------------------------------------------|
|              |   | in the paper.                                                                                                                                                                                                       |                                                                                                                                                                                                                                                                                                                                                                                                                                                                                                                                                                                                                                                                                                                                                 |
| Setting      | 5 | Describe the setting, locations, and relevant dates, including periods of recruitment, exposure, follow-up, and data collection.                                                                                    | Methods: Design & Setting, Study Cohort                                                                                                                                                                                                                                                                                                                                                                                                                                                                                                                                                                                                                                                                                                         |
| Participants | 6 | (a) Give the eligibility criteria, and the sources and methods of selection of participants. Describe methods of follow-up.<br>(b) For matched studies, give matching criteria and number of exposed and unexposed. | (6.1) The methods of study population selection (such as codes or algorithms used to identify subjects) should be listed in detail. If this is not possible, an explanation should be provided.<br>(6.2) Any validation studies of the codes or algorithms used to select the population should be referenced. If validation was conducted for this study and not published elsewhere, detailed methods and results should be provided.<br>(6.3) If the study involved linkage of databases, consider use of a flow diagram or other graphical display to demonstrate the data linkage process, including the number of individuals with linked data at each stage.<br>Methods: Study Cohort, Exposure & Outcomes, Statistical Analyses Results |
| Variables    | 7 | Clearly define all                                                                                                                                                                                                  | (7.1) A complete list of<br>Methods:                                                                                                                                                                                                                                                                                                                                                                                                                                                                                                                                                                                                                                                                                                            |

|                              |    |                                                                                                                                                                                       |                                                                                                                                                                                  |                                              |
|------------------------------|----|---------------------------------------------------------------------------------------------------------------------------------------------------------------------------------------|----------------------------------------------------------------------------------------------------------------------------------------------------------------------------------|----------------------------------------------|
|                              |    | outcomes, exposures, predictors, potential confounders, and effect modifiers. Give diagnostic criteria, if applicable.                                                                | codes and algorithms used to classify exposures, outcomes, confounders, and effect modifiers should be provided. If these cannot be reported, an explanation should be provided. | Exposure & Outcomes<br>Supplementary Table 2 |
| Data sources/<br>measurement | 8  | For each variable of interest, give sources of data and details of methods of assessment (measurement). Describe comparability of assessment methods if there is more than one group. |                                                                                                                                                                                  | Methods: Data Sources                        |
| Bias                         | 9  | Describe any efforts to address potential sources of bias.                                                                                                                            |                                                                                                                                                                                  | Discussion                                   |
| Study size                   | 10 | Explain how the study size was arrived at.                                                                                                                                            |                                                                                                                                                                                  | Results                                      |
| Quantitative variables       | 11 | Explain how quantitative variables were handled in the analyses. If applicable, describe which groupings were chosen and why.                                                         |                                                                                                                                                                                  | Methods                                      |
| Statistical methods          | 12 | (a) Describe all statistical methods, including those used to control for                                                                                                             |                                                                                                                                                                                  |                                              |

|                                  |                                                                                                                                                                                                                                                                          |                                                                                                                                                                                                                                                         |
|----------------------------------|--------------------------------------------------------------------------------------------------------------------------------------------------------------------------------------------------------------------------------------------------------------------------|---------------------------------------------------------------------------------------------------------------------------------------------------------------------------------------------------------------------------------------------------------|
|                                  | <p>confounding.</p> <p>(b) Describe any methods used to examine subgroups and interactions.</p> <p>(c) Explain how missing data were addressed.</p> <p>(d) If applicable, explain how loss to follow-up was addressed.</p> <p>(e) Describe any sensitivity analyses.</p> | Methods:<br>Statistical<br>Analyses                                                                                                                                                                                                                     |
| Data access and cleaning methods | N/A                                                                                                                                                                                                                                                                      | <p>(12.1) Authors should describe the extent to which the investigators had access to the database population used to create the study population.</p> <p>(12.2) Authors should provide information on the data cleaning methods used in the study.</p> |
| Linkage                          | N/A                                                                                                                                                                                                                                                                      | <p>(12.3) State whether the study included person-level, institutional-level, or other data linkage across two or more databases. The methods of linkage and methods of linkage quality evaluation should be provided.</p>                              |

## Results

---

|                  |    |                                                                                                                                                                                                                                                                                                                      |                                                                                                                                                                                                                                                                                                              |                                 |
|------------------|----|----------------------------------------------------------------------------------------------------------------------------------------------------------------------------------------------------------------------------------------------------------------------------------------------------------------------|--------------------------------------------------------------------------------------------------------------------------------------------------------------------------------------------------------------------------------------------------------------------------------------------------------------|---------------------------------|
| Participants     | 13 | <p>(a) Report numbers of individuals at each stage of study--e.g. numbers potentially eligible, examined for eligibility, confirmed eligible, included in the study, completing follow-up, and analyzed.</p> <p>(b) Give reasons for non-participation at each stage.</p> <p>(c) Consider use of a flow diagram.</p> | <p>(13.1) Describe in detail the selection of the persons included in the study (i.e., study population selection), including filtering based on data quality, data availability, and linkage. The selection of included persons can be described in the text and/or by means of the study flow diagram.</p> | Results, Supplementary Figure 1 |
| Descriptive data | 14 | <p>(a) Give characteristics of study participants (e.g. demographic, clinical, social) and information on exposures and potential confounders.</p> <p>(b) Indicate number of participants with missing data for each variable of interest.</p> <p>(c) Summarize follow-up time (e.g. average and total amount).</p>  |                                                                                                                                                                                                                                                                                                              | Results                         |
| Outcome data     | 15 | Report numbers of outcome events or                                                                                                                                                                                                                                                                                  |                                                                                                                                                                                                                                                                                                              | Results                         |

---

|                |    |                                                                                                                                                                                                                                                                                                                                                                                                                   |            |
|----------------|----|-------------------------------------------------------------------------------------------------------------------------------------------------------------------------------------------------------------------------------------------------------------------------------------------------------------------------------------------------------------------------------------------------------------------|------------|
|                |    | summary measures over time.                                                                                                                                                                                                                                                                                                                                                                                       |            |
| Main results   | 16 | (a) Give unadjusted estimates and, if applicable, confounder-adjusted estimates and their precision (e.g. 95% confidence interval). Make clear which confounders were adjusted for and why they were included.<br>(b) Report category boundaries when continuous variables were categorized.<br>(c) If relevant, consider translating estimates of relative risk into absolute risk for a meaningful time period. | Results    |
| Other analyses | 17 | Report other analyses done (e.g. analyses of subgroups and interactions, and sensitivity analyses).                                                                                                                                                                                                                                                                                                               | Results    |
| Key results    | 18 | Summarize key results with reference to study objectives.                                                                                                                                                                                                                                                                                                                                                         | Discussion |



|                          |    |                                                                                                                                                                             |                                                                                                                                                                                                                                                                                                    |                 |
|--------------------------|----|-----------------------------------------------------------------------------------------------------------------------------------------------------------------------------|----------------------------------------------------------------------------------------------------------------------------------------------------------------------------------------------------------------------------------------------------------------------------------------------------|-----------------|
| Limitations              | 19 | Discuss limitations of the study, taking into account sources of potential bias or imprecision. Discuss both direction and magnitude of any potential bias.                 | (19.1) Discuss the implications of using data that were not created or collected to answer the specific research question(s). Include discussion of misclassification bias, unmeasured confounding, missing data, and changing eligibility over time, as they pertain to the study being reported. | Discussion      |
| Interpretation           | 20 | Give a cautious overall interpretation of results considering objectives, limitations, multiplicity of analyses, results from similar studies, and other relevant evidence. |                                                                                                                                                                                                                                                                                                    | Discussion      |
| Generalizability         | 21 | Discuss the generalizability (external validity) of the study results.                                                                                                      |                                                                                                                                                                                                                                                                                                    | Discussion      |
| <b>Other information</b> |    |                                                                                                                                                                             |                                                                                                                                                                                                                                                                                                    |                 |
| Funding                  | 22 | Give the source of funding and the role of the funders for the present study and, if applicable, for the original study on                                                  |                                                                                                                                                                                                                                                                                                    | Acknowledgments |

which the present article is based.

Accessibility of protocol, raw data, and programming code

N/A

(22.1) Authors should provide information on how to access any supplemental information such as the study protocol, raw data, or programming code.

Supplements

---

Reference

1. Benchimol EI, Smeeth L, Guttman A, Harron K, Moher D, Petersen I, Sørensen HT, von Elm E, Langan SM; RECORD Working Committee. The REporting of studies Conducted using Observational Routinely-collected health Data (RECORD) statement. 2015. PLoS Med. 12(10):1-22.

**Table 2:** Administrative data definitions

| <b>Variable</b>          | <b>Data Source</b>                                                                                                                           | <b>Definition</b>                                                                                                                                                                                                                                                                                                                                                    |
|--------------------------|----------------------------------------------------------------------------------------------------------------------------------------------|----------------------------------------------------------------------------------------------------------------------------------------------------------------------------------------------------------------------------------------------------------------------------------------------------------------------------------------------------------------------|
| Atrial fibrillation      | Canadian Institute for Health Information (CIHI) Discharge Abstract Database (DAD)<br>CIHI National Ambulatory Care Reporting System (NACRS) | International Classification of Disease (ICD)<br>ICD 9: 4273<br><br>ICD 10: I48                                                                                                                                                                                                                                                                                      |
| Stroke                   | CIHI-DAD<br>CIHI-NACRS                                                                                                                       | Ischemic stroke<br>ICD 9: 436, 4340, 4341, 4349, 3623<br>ICD 10: I630, I631, I632, I633, I634, I635, I638, I639, I64, H341<br><br>Subarachnoid, intracerebral and other non-traumatic intracranial hemorrhage<br>ICD 9: 430, 431, 432<br>ICD 10: I600, I601, I602, I603, I604, I605, I606, I607, I609, I61, I62                                                      |
| Congestive heart failure | CIHI-DAD<br>Ontario Health Insurance Plan (OHIP)                                                                                             | ICD 9: 425, 5184, 514, 428<br>ICD 10: I500, I501, I509, I255, J81<br><br>Canadian Classification of Diagnostic, Therapeutic and Surgical Procedures (CCP)<br>CCP: 4961, 4962, 4963, 4964<br><br>Canadian Classification of Health Interventions (CCI)<br>CCI: 1HP53, 1HP55, 1HZ53GRFR, 1HZ53LAFR, 1HZ53SYFR<br><br>OHIP Fee: R701, R702, Z429<br>OHIP Diagnosis: 428 |
| Major hemorrhage         | CIHI-DAD                                                                                                                                     | ICD 9: 430, 431, 432, 5307, 5310, 5312, 5314, 5316, 5320, 5322, 5324, 5326, 5330, 5332, 5334, 5336, 5340, 5342, 5344, 5346, 5780, 5781, 5693, 5789                                                                                                                                                                                                                   |

|                                               |                                |                                                                                                                                                                                                                                                                                                                                    |
|-----------------------------------------------|--------------------------------|------------------------------------------------------------------------------------------------------------------------------------------------------------------------------------------------------------------------------------------------------------------------------------------------------------------------------------|
|                                               |                                | ICD 10: I600, I601, I602, I603, I604, I605, I606, I607, I609, I61, I62, I850, I9820, I983, K2210, K2211, K2212, K2214, K2216, K226, K228, K250, K252, K254, K256, K260, K262, K264, K266, K270, K272, K274, K276, K280, K282, K284, K286, K290, K3180, K31811, K6380, K920, K921, K5520, K625, K922                                |
| Myocardial infarction                         | CIHI-DAD<br>CIHI-NACRS         | ICD 9: 410                                                                                                                                                                                                                                                                                                                         |
| Coronary artery disease<br>(excluding angina) | CIHI-DAD<br>CIHI-NACRS<br>OHIP | ICD 10: I21, I22<br>ICD 9: 412, 410, 411<br>ICD 10: I21, I22, Z955, T822<br>CCI: 1IJ50, 1IJ76<br>CCP: 4801, 4802, 4803, 4804, 4805, 481, 482, 483<br>OHIP Fee: R741, R742, R743, G298, E646, E651, E652, E654, E655, Z434, Z448<br>OHIP Diagnosis: 410, 412                                                                        |
| Peripheral vascular disease                   | CIHI-DAD<br>CIHI-NACRS<br>OHIP | ICD 9: 4402, 4408, 4409, 5571, 4439, 444<br>ICD 10: I700, I702, I708, I709, I731, I738, I739, K551<br>CCP: 5125, 5129, 5014, 5016, 5018, 5028, 5038, 5126, 5159<br>CCI: 1KA76, 1KA50, 1KE76, 1KG50, 1KG57, 1KG76MI, 1KG87, 1IA87LA, 1IB87LA, 1IC87LA, 1ID87, 1KA87LA, 1KE57<br>OHIP fee: R787, R780, R797, R804, R809, R875, R815, |

|                                       |                                |                                                                                                                            |
|---------------------------------------|--------------------------------|----------------------------------------------------------------------------------------------------------------------------|
|                                       |                                | R936, R783, R784, R785, E626, R814, R786, R937, R860, R861, R855, R856, R933, R934, R791, E672, R794, R813, R867, E649     |
| Coronary artery bypass graft          | CIHI-DAD<br>OHIP               | CCI: 1IJ76<br><br>CCP: 4811, 4812, 4813, 4814, 4815, 4816, 4817, 4819<br><br>OHIP fee: R742, R743, E654, E645, E652, E646  |
| Chronic obstructive pulmonary disease | CIHI-DAD                       | ICD 9: 491, 492, 496<br><br>ICD 10: J41, J43, J44                                                                          |
| Diabetes mellitus                     | CIHI-DAD<br>CIHI-NACRS<br>OHIP | ICD 9: 250<br><br>ICD 10: E10, E11, E12, E13, E14<br><br>OHIP fee: Q040, K029, K030, K045, K046<br><br>OHIP Diagnosis: 250 |
| Hypertension                          | CIHI-DAD<br>CIHI-NACRS<br>OHIP | ICD 9: 401, 402, 403, 404, 405<br><br>ICD 10: I10, I11, I12, I13, I15<br><br>OHIP Diagnosis: 401, 402, 403                 |

**Table 3:** Number of events and adjusted stroke risk with atrial fibrillation across eGFR levels (no atrial fibrillation as referent).

| <b>Kidney Function</b><br>(ml/min/1.73m <sup>2</sup> ) | <b>Crude Number of Events (%)</b> |                              | <b>Hazard ratio (95%CI)*</b> |
|--------------------------------------------------------|-----------------------------------|------------------------------|------------------------------|
|                                                        | <b><u>AF</u></b><br>N (%)         | <b><u>No AF</u></b><br>N (%) | <b><u>AF</u></b>             |
| <b>eGFR &gt; 90</b>                                    | 381 (5.0)                         | 189 (2.5)                    | 2.15<br>(1.81-2.55)          |
| <b>eGFR 60-90</b>                                      | 1376 (7.0)                        | 632 (3.2)                    | 2.26<br>(2.06-2.48)          |
| <b>eGFR 45-60</b>                                      | 531 (7.8)                         | 280 (4.1)                    | 1.97<br>(1.70-2.28)          |
| <b>eGFR 30-44</b>                                      | 302 (7.9)                         | 158 (4.1)                    | 2.00<br>(1.65-2.42)          |
| <b>eGFR &lt; 30</b>                                    | 75 (6.3)                          | 57 (4.8)                     | 1.38<br>(0.99-1.92)          |

Abbreviations: eGFR estimated glomerular filtration rate, AF atrial fibrillation, N number, % percentage, ml millilitre, min minute, m metre, CI confidence interval

\*sub-distribution hazard ratio accounting for the competing risk of death

**Table 4:** Number of events and adjusted stroke risk with atrial fibrillation across ACR levels (no atrial fibrillation as referent).

| <b>Kidney<br/>Function<br/>(mg/g)</b> | <b><u>Crude Number of<br/>Events(%)</u></b> |                               | <b><u>Hazard ratio<br/>(95%CI)*</u></b> |
|---------------------------------------|---------------------------------------------|-------------------------------|-----------------------------------------|
|                                       | <b><u>AF</u><br/>N (%)</b>                  | <b><u>No AF</u><br/>N (%)</b> | <b><u>AF</u></b>                        |
| <b>ACR &lt;3</b>                      | 1575 (6.1)                                  | 735 (2.9)                     | 2.23<br>(2.04-2.43)                     |
| <b>ACR 3-30</b>                       | 877 (8.2)                                   | 438 (4.1)                     | 2.09<br>(1.86-2.35)                     |
| <b>ACR &gt;30</b>                     | 213 (8.0)                                   | 143 (5.4)                     | 1.61<br>(1.31-1.99)                     |

Abbreviations: ACR albumin to creatinine ratio, AF atrial fibrillation, mg milligram, g gram, CI confidence interval  
\*sub-distribution hazard ratio accounting for the competing risk of death

**Table 5:** Crude number of events for stroke by atrial fibrillation status, eGFR and ACR level with eGFR > 90 ml/min/1.73m<sup>2</sup>/ACR <3 mg/g and absence of atrial fibrillation as referent.

| <b>Kidney Function</b><br>(eGFR in<br>ml/min/1.73m <sup>2</sup> ,<br>ACR in mg/g)<br>N(%) | <b><u>No Atrial Fibrillation</u></b> |                 |                  | <b><u>Atrial Fibrillation</u></b> |                 |                  |
|-------------------------------------------------------------------------------------------|--------------------------------------|-----------------|------------------|-----------------------------------|-----------------|------------------|
|                                                                                           | <b>ACR&lt;3</b>                      | <b>ACR 3-30</b> | <b>ACR&gt;30</b> | <b>ACR&lt;3</b>                   | <b>ACR 3-30</b> | <b>ACR&gt;30</b> |
| <b>eGFR &gt; 90</b>                                                                       | 108(2)                               | 52(3)           | 29(7.4)          | 227(4.2)                          | 128(7.3)        | 26(6.7)          |
| <b>eGFR 60-90</b>                                                                         | 369(2.7)                             | 216(4.3)        | 47(5.1)          | 863(6.3)                          | 431(8.5)        | 82(8.8)          |
| <b>eGFR 45-60</b>                                                                         | 157(3.8)                             | 91(4.4)         | 32(5.5)          | 298(7.2)                          | 184(8.8)        | 49(8.5)          |
| <b>eGFR 30-44</b>                                                                         | 80(4)                                | 56(4.2)         | 22(4.5)          | 153(7.6)                          | 109(8.1)        | 40(8.2)          |
| <b>eGFR &lt; 30</b>                                                                       | 21(4.7)                              | 23(4.7)         | 13(5)            | 34(7.6)                           | 25(5.1)         | 16(6.1)          |

Abbreviations: eGFR estimated glomerular filtration rate, ACR albumin to creatinine ratio, N number
